# Supplementary material for: Advancing Equity in Green Social Prescribing: Exploring Racial and Ethnic Disparities in Access and Inclusion
Source: Research Square preprint supplement (doi:10.21203/rs.3.rs-6513516/v1), 2025-05-09
Supplement: Supplementary file 1 [file 4f3a596cae8d2ff5ab451f31.docx]

**Supplementary File 2: Green Social Prescribing Study - Interview & Focus Group Schedule**

**Green Social Prescribing Providers – Interview**

- What provider or organisation do you work for?
- Please state what your role and responsibilities?
- What do you understand by the terms, ‘green social prescribing and nature-based interventions (NBIs)?’
- As a service provider how long has your department been delivering, ‘green social prescribing and nature-based interventions?
- Explain the reason why your organisation began providing green social prescribing and nature-based interventions?
- To ensure you deliver excellent and competent green social prescribing and nature-based intervention services, what training/ education have you undertaken or is there ongoing training programme available?
  - What training and education would you like/ need?
- What types of patients/service users are these interventions mainly targeted at or offered to? Please explain further.
- What types of communities are the patients that you normally receive referrals from?
- What is your understanding of minority ethnic and racialised groups?
- Do you think that the existing green social prescribing and nature-based interventions are equally representative and accessible to diverse and marginalised groups?
- How do they considering the cultural differences within these communities?
- What are the barriers to accessing green social prescribing and nature-based interventions for minority ethnic groups?
- Please give examples of programmes that have been tailored to meet the needs of marginalised and minority groups?
  - What are the core components and contextual factors that improve accessibility.
- Please share with us some of the challenges you have experienced delivering NBIs?
- What are your suggestions on how to improve access and engagement for service users from minority ethnic and racialised communities?

**Community Member - Focus Group**

- Please state what ethnic and racial group you identify with?
- What do you understand by the terms, ‘green social prescribing and nature-based interventions (NBIs)?’
- Please explain to us what nature-based activities (if any) you have had access to and been engaged with so far?
- Who recommended and referred you to these nature-based activities?
- What was the outcome of this/ these intervention/s on your health and wellbeing?
- What are the aspects that you enjoyed the most and why?
- What else would you have liked to be included?
- Do you think that during your referral to NBI’s you were given equal access and engagement as your white counter parts?

If yes, please explain why?

If no, please explain why?

- What is your opinion on the existing green prescribing and nature-based interventions?
  - Which aspects do you enjoy?
  - What would you like to see more of?

Do you feel NBIs are accessible to people like yourself from diverse and marginalised groups, and consider existing cultural differences?

If yes, please explain why?

If no, please explain why?

- What are your suggestions on how access and engagement can be improved for people from ethnic and racialised groups?
- Are there any other things that need to be considered
